# Supplementary material for: Advances in nitrogen fertilizer technologies for improved nutrient efficiency and sustainable coffee production
Source: Research Square preprint supplement (doi:10.21203/rs.3.rs-6719604/v1), 2025-06-10
Supplement: Supplementary file 1 [file b4d210dfc640d6a971b987af.docx]

**SUPPLEMENTARY MATERIALS**

**Table S1**. Soil chemical properties in the experimental area located in Santo Antônio do Amparo, 2021–2022 crop season.

| **Source** | **dose** | **pH** | **K** | **P-rem** | **Ca** | **Mg** | **Al** | **H+Al** | **SB** | **t** | **T** | **V** | **m** | **Zn** | **Fe** | **Mn** | **Cu** | **B** | **S** |
| --- | --- | --- | --- | --- | --- | --- | --- | --- | --- | --- | --- | --- | --- | --- | --- | --- | --- | --- | --- |
|  | kg ha-1 | CaCl2 | --mg dm-³-- | | ----------cmolc dm-³---------- | | | | ----cmolc dm-³---- | | | ----%---- | | --------------------mg dm-³-------------------- | | | | | |
| Control | 0 | 6.6 | 380 | 17.8 | 4.3 | 1.6 | 0.2 | 1.8 | 6.9 | 7.0 | 8.7 | 78.9 | 2.1 | 13.7 | 24.3 | 12.4 | 4.3 | 0.3 | 43.6 |
| UNBPT | 150 | 7.0 | 391 | 19.6 | 3.6 | 2.9 | 0.1 | 1.5 | 7.5 | 7.6 | 9.0 | 82.9 | 1.3 | 11.7 | 26.6 | 14.1 | 4.4 | 0.3 | 26.1 |
| 275 | 5.5 | 278 | 20.1 | 3.3 | 1.4 | 0.1 | 3.9 | 5.4 | 5.4 | 9.3 | 58.1 | 1.0 | 7.7 | 26.3 | 13.3 | 4.6 | 0.3 | 81.0 |
| 400 | 5.7 | 326 | 21.2 | 3.5 | 1.6 | 0.1 | 3.8 | 5.9 | 6.0 | 9.7 | 60.5 | 2.0 | 16.6 | 26.4 | 11.4 | 4.4 | 0.5 | 124.4 |
| 525 | 5.8 | 367 | 20.0 | 3.4 | 1.5 | 0.1 | 3.6 | 5.9 | 5.9 | 9.5 | 62.2 | 1.2 | 10.3 | 27.8 | 12.4 | 4.8 | 0.2 | 35.5 |
| NA | 150 | 6.1 | 375 | 19.1 | 3.5 | 2.3 | 0.1 | 2.8 | 6.7 | 6.8 | 9.5 | 69.2 | 2.2 | 10.0 | 30.0 | 16.0 | 4.3 | 0.3 | 59.4 |
| 275 | 6.0 | 342 | 21.5 | 3.1 | 2.1 | 0.1 | 3.4 | 6.1 | 6.2 | 9.6 | 64.6 | 1.1 | 20.2 | 26.4 | 11.9 | 4.8 | 0.2 | 53.7 |
| 400 | 6.4 | 368 | 22.9 | 3.1 | 2.2 | 0.1 | 2.8 | 6.2 | 6.3 | 9.0 | 69.3 | 1.2 | 13.5 | 27.5 | 10.8 | 6.2 | 0.2 | 31.6 |
| 525 | 5.1 | 327 | 17.9 | 1.9 | 1.1 | 0.3 | 6.4 | 3.8 | 4.1 | 10.2 | 38.5 | 9.2 | 5.3 | 31.9 | 7.7 | 4.5 | 0.3 | 141.1 |
| Conventional  urea | 150 | 7.2 | 406 | 18.7 | 4.0 | 2.2 | 0.1 | 1.5 | 7.3 | 7.4 | 8.8 | 82.1 | 1.4 | 13.0 | 21.4 | 15.4 | 4.9 | 0.3 | 20.4 |
| 275 | 6.8 | 363 | 21.4 | 3.7 | 2.9 | 0.1 | 1.8 | 7.5 | 7.6 | 9.3 | 80.8 | 1.0 | 15.9 | 27.7 | 15.6 | 5.0 | 0.3 | 32.9 |
| 400 | 5.9 | 288 | 17.3 | 3.5 | 2.8 | 0.2 | 3.0 | 7.0 | 7.1 | 9.9 | 69.3 | 3.6 | 12.8 | 22.6 | 10.2 | 4.0 | 0.2 | 103.4 |
| 525 | 5.6 | 281 | 22.6 | 3.5 | 1.7 | 0.1 | 3.7 | 5.9 | 6.0 | 9.6 | 61.6 | 2.8 | 13.0 | 27.8 | 14.0 | 4.8 | 0.3 | 84.0 |

pH in CaCl2; P, K, Fe, Zn, Mn, and Cu: extractor Mehlich-1; Ca2+, Mg2+, Al3+: extractor 1 mol L-1 KCl; H + Al: Extractor: SMP; SB: sum of exchangeable bases; CEC (t): Cation Exchange Capacity; CEC (T): Cation Exchange Capacity at pH 7.0; V: Base Saturation Index; m: Aluminum Saturation Index; P-rem: Remaining Phosphorus; B: Extractor–hotwater.

**
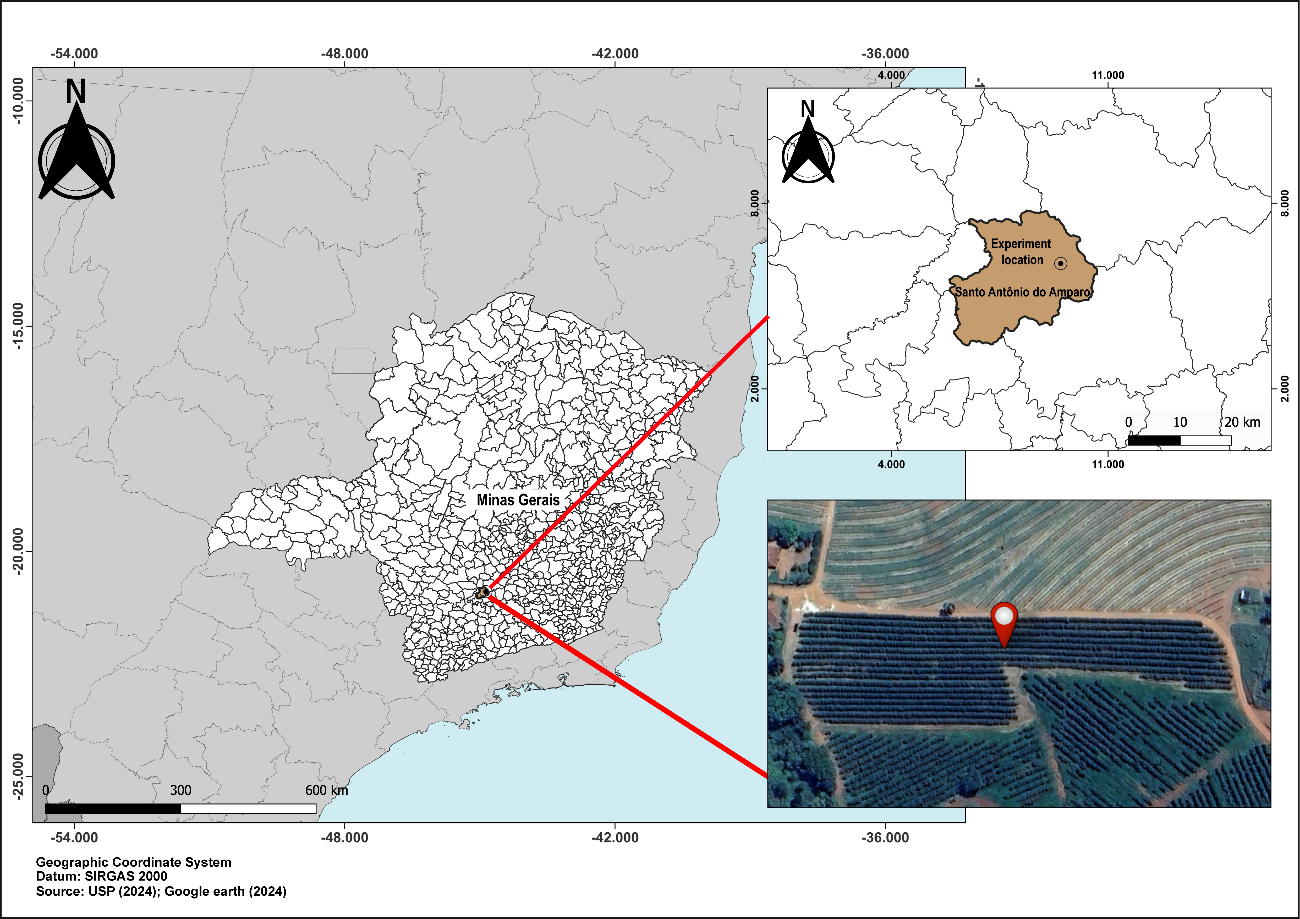
**

**Figure S1.** Location of coffee field trial in the municipality of Santo Antônio do Amparo, Minas Gerais state, Brazil.

**
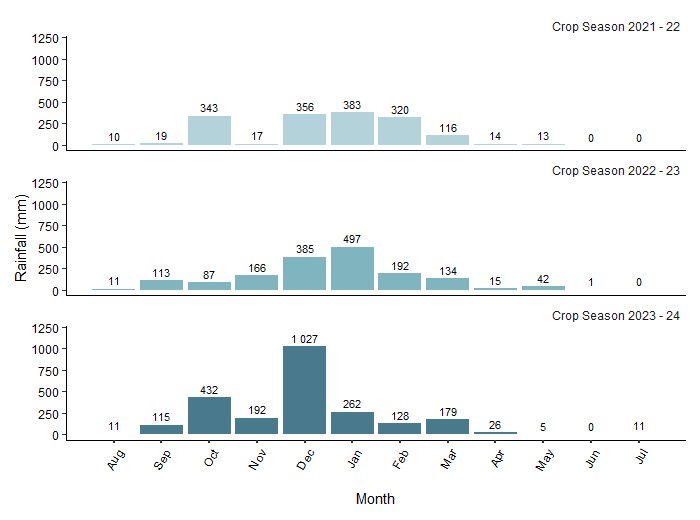
**

**Figure S2.** Monthly accumulated rainfall during the 2021–22, 2022–23, and 2023–24 crop seasons.

| Type of input applied | Fertilizer | Application site | Nurient Concentration | Dose  kg ha-1 | Application date |
| --- | --- | --- | --- | --- | --- |
| (%) |
|  |  |  |  |  |  |
| Gypsum | - |  | - | 500 | 22/10/2020 |
|  | Triple Superphosphate | Total area | 46 (P2O5) | 412 | 21/03/2021 |
|  | Formulated - NPK | Total area | 16 – 16 – 16 | 765 | 04/12/2020 |
|  | Formulated - NPK | Border area | 20 – 05 – 20 | 588 | 07/01/2021 |
|  | Formulated - NPK | Border area | 20 – 05 – 20 | 411 | 18/02/2021 |
|  | Formulated - NPK | Border area | 19 – 04 – 19 | 708 | 15/12/2021 |
|  | Formulated - NPK | Border area | 19 – 04 – 19 | 493 | 25/02/2022 |
|  | Ammonium nitrate | Border area | 27 | 373 | 01/04/2022 |
| Gypsum | - | Área total | - | 1601 | 23/11/2022 |
|  | Ulexita | Total area | 10 | 60 | 11/04/2023 |
|  | Formulated - NPK | Border area | 16 – 16 – 16 | 708 | 16/10/2022 |
|  | Formulated - NPK | Border area | 20 – 00 – 20 | 566 | 26/12/2022 |
|  | Ammonium nitrate | Border area | 27 | 411 | 03/04/2023 |
|  | Ammonium nitrate | Border area | 27 | 430 | 07/12/2023 |
|  | Ammonium nitrate | Border area | 27 | 430 | 23/01/2024 |
|  | Ammonium nitrate | Border area | 27 | 430 | 13/02/2024 |
|  | Potassium chloride | Total area | 60 (K2O) | 164 | 07/12/2023 |
|  | Potassium chloride | Total area | 60 (K2O) | 126 | 23/01/2024 |
|  | Ammonium nitrate | Border area | 27 | 417 | 27/11/2024 |
|  | Ammonium nitrate | Border area | 27 | 835 | 21/02/2025 |
|  | Potassium chloride | Total area | 60 (K2O) | 284 | 17/01/2025 |
|  | Potassium chloride | Total area | 60 (K2O) | 284 | 21/03/2025 |
|  |  |  |  |  |  |

**Table S2.** History of fertilizer and gypsum applications in the experimental area from 2020 to 2025.

**Table S3.** Climatic data for the three fertilization treatments for the 2021-22 coffee crop.

| Climatic data |  | Days after N application – Crop Season 2021 – 22 | | | | | | | |
| --- | --- | --- | --- | --- | --- | --- | --- | --- | --- |
| 0 | 1 | 2 | 3 | 4 | 5 | 6 | 7 | ∑ 7 days |
|  | --------------------- First parceled --------------------- | | | | | | | |
| Precipitation (mm) | 31.8 | 3.6 | 0 | 0 | 0.2 | 5.8 | 0.6 | 82 | 124 |
| Fffective rainfall(mm)¹ | 15.4 | 0 | 0 | 0 | 0 | 0 | 0 | 82 | 97.4 |
| Average temperature (°C) | 17.0 | 18.6 | 20.1 | 22.0 | 21.0 | 21.5 | 22.2 | 20.5 | - |
| Humidity max (%) | 95.0 | 84.95 | 77.7 | 76.1 | 83.6 | 85.5 | 85.9 | 98.6 | - |
| Humidity min (%) | 95.0 | 78.4 | 72.2 | 68.8 | 79.4 | 79.7 | 78.7 | 85.4 | - |
|  |  | --------------------- Second parceled --------------------- | | | | | | | |
| Precipitation (mm) | 0 | 0 | 42.4 | 0 | 0.4 | 0 | 0 | 0.6 | 43.4 |
| Effective rainfall(Ll efec)¹ | 0 | 0 | 21.5 | 0 | 0 | 0 | 0 | 0 | 21.5 |
| Average temperature (°C) | 21.0 | 23.0 | 21.4 | 21.8 | 21.9 | 20.5 | 21.1 | 21.7 | - |
| Humidity max (%) | 83.2 | 77.6 | 76.3 | 58.4 | 52.6 | 53.1 | 50.8 | 48.8 | - |
| Humidity min (%) | 78.0 | 67.1 | 54.9 | 28.8 | 30.3 | 28.6 | 29.9 | 30.5 | - |
|  |  | --------------------- Third parceled --------------------- | | | | | | | |
| Precipitation (mm) | 30.2 | 0.6 | 0 | 0 | 0 | 0 | 0 | 0 | 30.8 |
| Effective rainfall(Ll efec)¹ | 14.6 | 0 | 0 | 0 | 0 | 0 | 0 | 0 | 14.6 |
| Average temperature (°C) | 23.63 | 25.30 | 26.7 | 26.3 | 25.5 | 25.6 | 25.8 | 24.4 | - |
| Humidity max (%) | 91.4 | 81.0 | 76.3 | 74.9 | 75.4 | 73.6 | 74.9 | 77.6 | - |
| Humidity min (%) | 65.5 | 58.2 | 53.8 | 51.8 | 51.3 | 50.1 | 49.7 | 50.1 | - |

1: Effective rainfall (Lleff) was estimated using the equation proposed by Ramírez & Jaramillo (2010), considering daily total rainfall (LL) and an exponential reduction factor. When LL > 6.0 mm, effective rainfall was calculated as: Lle = 69.13 / (1 + 12.45 * exp(-0.040 * LL)). For LL ≤ 6.0 mm, Lle was assumed to be zero, and for LL > 44 mm, Lle was considered equal to LL.

| Climatic data |  | Days after N application – Crop Season 2021 – 22 | | | | | | | |
| --- | --- | --- | --- | --- | --- | --- | --- | --- | --- |
| 0 | 1 | 2 | 3 | 4 | 5 | 6 | 7 | ∑ 7 days |
|  | --------------------- First parceled --------------------- | | | | | | | |
| Precipitation (mm) | 5.2 | 0.0 | 0.0 | 0.2 | 0.0 | 0.0 | 0.0 | 7.4 | 12.8 |
| Chuva efetiva (mm)¹ | 0 | 0 | 0 | 0 | 0 | 0 | 0 | 6.73 | 6.73 |
| Average temperature (°C) | 21.6 | 21.4 | 21.8 | 21.3 | 21.8 | 23.3 | 21.7 | 23.7 | - |
| Humidity max (%) | 86.0 | 73.2 | 80.8 | 77.4 | 67.1 | 59.6 | 66.0 | 79.6 | - |
| Humidity min (%) | 63.1 | 74.1 | 64.1 | 57.6 | 62.9 | 58.8 | 64.4 | 64.2 | - |
|  |  | --------------------- Second parceled --------------------- | | | | | | | |
| Precipitation (mm) | 7 | 0.2 | 0.2 | 0.0 | 11.4 | 0.0 | 40.0 | 10.0 | 68.8 |
| Chuva efetiva (Ll efec)¹ | 6.6 | 0 | 0 | 0 | 7.7 | 0 | 19.67 | 7.40 | 41.37 |
| Average temperature (°C) | 21.9 | 23.7 | 22.8 | 22.7 | 21.3 | 20.7 | 20.4 | 19.7 | - |
| Humidity max (%) | 61.7 | 67.1 | 82.1 | 74.1 | 91.6 | 91.7 | 72.1 | 80.1 | - |
| Humidity min (%) | 49.9 | 56.6 | 67.2 | 63.5 | 78.3 | 73.4 | 62.5 | 75.5 | - |
|  |  | --------------------- Third parceled --------------------- | | | | | | | |
| Precipitation (mm) | 25.8 | 2.4 | 0.0 | 3.6 | 36.6 | 1.2 | 6.8 | 0.0 | 76.4 |
| Chuva efetiva (Ll efec)¹ | 12.71 | 0 | 0 | 0 | 17.81 | 0 | 6.59 | 0 | 37.11 |
| Average temperature (°C) | 20.8 | 22.2 | 22.4 | 21.7 | 20.8 | 20.9 | 20.5 | 22.1 | - |
| Humidity max (%) | 71.6 | 74.4 | 86.8 | 93.9 | 90.5 | 88.7 | 78.4 | 80.1 | - |
| Humidity min (%) | 62.0 | 64.3 | 73.6 | 83.4 | 69.9 | 74.6 | 67.2 | 68.9 | - |

**Table S4.** Climatic data for the three fertilization treatments for the 2022-23 coffee crop.

1: Effective rainfall (Lleff) was estimated using the equation proposed by Ramírez & Jaramillo (2010), considering daily total rainfall (LL) and an exponential reduction factor. When LL > 6.0 mm, effective rainfall was calculated as: Lle = 69.13 / (1 + 12.45 * exp(-0.040 * LL)). For LL ≤ 6.0 mm, Lle was assumed to be zero, and for LL > 44 mm, Lle was considered equal to LL.

| Climatic data |  | Days after N application | | | | | | | |
| --- | --- | --- | --- | --- | --- | --- | --- | --- | --- |
| 0 | 1 | 2 | 3 | 4 | 5 | 6 | 7 | ∑ 7 days |
|  | --------------------- First parceled --------------------- | | | | | | | |
| Precipitation (mm) | 0.0 | 0.0 | 0.0 | 0.0 | 0.0 | 0.0 | 0.0 | 0.0 | 0.0 |
| Chuva efetiva (Ll efec)¹ | 0 | 0 | 0 | 0 | 0 | 0 | 0 | 0 | 0.0 |
| Average temperature (°C) | 28.7 | 29.7 | 33.0 | 34.1 | 31.5 | 29.9 | 31.2 | 31.7 | - |
| Humidity max (%) | 36.7 | 37.8 | 30.0 | 28.8 | 40.7 | 49.6 | 43.5 | 41.2 | - |
| Humidity min (%) | 29.0 | 29.2 | 25.0 | 21.6 | 32.5 | 38.5 | 34.8 | 35.0 | - |
|  |  | --------------------- Second parceled --------------------- | | | | | | | |
| Precipitation (mm) | 0.0 | 0.4 | 40.0 | 11.6 | 1.6 | 18.0 | 0.4 | 0.8 | 72.8 |
| Chuva efetiva (Ll efec)¹ | 0 | 0 | 19.6 | 7.83 | 0 | 9.79 | 0 | 0 | 37.2 |
| Average temperature (°C) | 25.3 | 25.2 | 21.2 | 19.5 | 20.6 | 20.3 | 25.2 | 22.9 | - |
| Humidity max (%) | 70.0 | 74.0 | 84.3 | 88.2 | 85.7 | 92.1 | 69.6 | 79.2 | - |
| Humidity min (%) | 64.2 | 63.7 | 79.0 | 85.1 | 80.9 | 90.3 | 57.8 | 70.2 | - |
|  |  | --------------------- Third parceled --------------------- | | | | | | | |
| Precipitation (mm) | 0.8 | 0.4 | 0.4 | 0.0 | 5.8 | 4.2 | 8.0 | 5.6 | 25.2 |
| Chuva efetiva (Ll efec)¹ | 0 | 0 | 0 | 0 | 0 | 0 | 6.88 | 0 | 6.88 |
| Average temperature (°C) | 21.8 | 21.8 | 22.3 | 21.1 | 21.3 | 21.1 | 21.1 | 23.2 | - |
| Humidity max (%) | 85.6 | 83.4 | 79.0 | 89.1 | 89.2 | 90.5 | 80.5 | 72.0 | - |
| Humidity min (%) | 79.0 | 76.3 | 70.3 | 85.3 | 84.4 | 86.0 | 86.6 | 71.6 | - |

**Table S5.** Climatic data for the three fertilization treatments for the 2023-24 coffee crop.

1Effective rainfall (Lleff) was estimated using the equation proposed by Ramírez & Jaramillo (2010), considering daily total rainfall (LL) and an exponential reduction factor. When LL > 6.0 mm, effective rainfall was calculated as: Lle = 69.13 / (1 + 12.45 * exp(-0.040 * LL)). For LL ≤ 6.0 mm, Lle was assumed to be zero, and for LL > 44 mm, Lle was considered equal to LL.

| **Crop season 2021- 22** | | | | | | | | | |
| --- | --- | --- | --- | --- | --- | --- | --- | --- | --- |
| Fertilizers | Application parceled | Days after application of N | | | | | | Media | Reduction in urease activity (%) |
|  | Dose  400 kg ha-1 | 1 | 2 | 3 | 4 | 5 | 6 | - |  |
| NA | 1 | 0.49 (32) | 0.56 (46) | 0.45 (60) | 0.83 (45) | 0.33 (62) | 0.07 (92) | 0.46 | 56 |
| 2 | 0.62 (57) | 0.55 (75) | 0.74 (35) | 1.15 (29) | 0.13 (91) | 0.88 (56) | 0.68 | 60 |
| 3 | 0.99 | 0.77 | 0.42 | 0.23 | 0.42 | 0.73 | 0.59 | 67 |
| UC | 1 | 0.72 | 1.04 | 1.11 | 1.52 | 0.89 | 0.96 | 1.04 | - |
| 2 | 1.44 | 2.24 | 1.14 | 1.63 | 1.53 | 2.00 | 1.66 | - |
| 3 | 4.00 | 0.31 | 0.56 | 0.52 | 0.56 | 4.79 | 1.79 | - |
| UNBPT | 1 | 0.55 (23) | 0.68 (35) | 0.66 (41) | 1.31 (14) | 0.46 (48) | 0.30 (69) | 0.66 | 36 |
| 2 | 0.66 (54) | 0.56 (75) | 0.53 (53) | 0.43 (74) | 0.52 (66) | 1.14 (43) | 0.64 | 61 |
| 3 | 1.41 (65) | 1.15 (-270) | 0.24 (57) | 1.52  (-192) | 0.76  (-35) | 1.45 (70) | 1.09 | 39 |

**Table S6.** Urease activity during the first six days after nitrogen fertilizer application in the 2021–22 crop season.

| **Crop season 2022- 23** | | | | | | | | | | |
| --- | --- | --- | --- | --- | --- | --- | --- | --- | --- | --- |
| Fertilizer | Application parceled | Days after application | | | | Media | | Reduction in urease activity (%) | |
|  | Dose 150  kg ha-1 | 1 | 2 | 3 | 4 | 5 | 6 | - |  |
| NA | 1 | 0.78 (73) | 1.30 (7) | 1.13 (47) | 1.53 (35) | 0.87 (35) | 0.97  (54) | 1.10 | 45 |
| 2 | 0.84 (31) | 0.31 (81) | 1.38 (17) | 0.42 (58) | 0.69  (-6) | 0.79  (31) | 0.74 | 39 |
| 3 | 0.56 (45) | 0.27 (89) | 0.64 (60) | 0.61 (18) | 0.98 (34) | 1.10  (35) | 0.69 | 54 |
| UC | 1 | 2.88 | 1.40 | 2.13 | 2.34 | 1.35 | 2.09 | 2.00 | - |
| 2 | 1.21 | 1.62 | 1.67 | 1.00 | 0.65 | 1.14 | 1.21 | - |
| 3 | 1.02 | 2.49 | 1.62 | 0.74 | 1.49 | 1.70 | 1.51 | - |
| UNBPT | 1 | 0.59 (79) | 1.05 (25) | 1.13 (47) | 1.10 (53) | 1.07 (21) | 1.43  (32) | 1.06 | 47 |
| 2 | 0.94 (22) | 1.75 (-8) | 1.29 (23) | 0.63 (37) | 1.37  (-110) | 1.09  (4) | 1.18 | 0.02 |
| 3 | 1.98  (-94) | 1.56  (37) | 1.75 (-8) | 2.82  (-281 | 1.30 (13) | 0.72  (58) | 1.68 | -11 |
|  | Dose 400 kg ha-1 | 1 | 2 | 3 | 4 | 5 | 6 | - |  |
| NA | 1 | 1.08 (85) | 1.09 (58) | 1.31 (36) | 1.59  (76) | 1.98  (70) | 0.65  (92) | 1.28 | 72 |
| 2 | 0.56 (58) | 1.08 (-9) | 0.87 (46) | 0.35  (62) | 0.31  (64) | 0.71  (47) | 0.69 | 41 |
| 3 | 0.43 (77) | 0.73 (24) | 0.41 (68) | 0.94  (-17) | 0.52  (51) | 1.17  (31) | 0.70 | 45 |
| UC | 1 | 7.49 | 2.62 | 2.06 | 6.57 | 6.51 | 8.17 | 5.57 | - |
| 2 | 1.35 | 0.99 | 1.61 | 0.91 | 0.86 | 1.35 | 1.18 | - |
| 3 | 1.88 | 0.96 | 1.28 | 0.80 | 1.06 | 1.69 | 1.28 | - |
| UNBPT | 1 | 0.59 (92) | 0.57 (78) | 1.30 (37) | 2.06 (69) | 1.30  (80) | 1.25  (85) | 1.18 | 79 |
| 2 | 1.04 (23) | 1.62  (-64) | 1.48 (8) | 0.60 (34) | 1.29  (-50) | 1.68  (-24) | 1.29 | -0.09 |
| 3 | 1.88  (0) | 1.58  (-65) | 1.91  (-49) | 2.63  (-228) | 2.35  (-122) | 7.08  (-318) | 2.90 | -1.26 |

**Table S7.** Urease activity during the first six days after nitrogen fertilizer application in the 2022–23 crop season.

| Fertilizers | Doses de N aplicadas | Modeled estimate of N-NH₃ volatilization losses (parameter *a*) | | | Cumulative N-NH₃ losses across crop seasons | **Reduction in N-NH₃ losses compared to conventional urea** |
| --- | --- | --- | --- | --- | --- | --- |
|  |  | 2021 – 22 | 2022 – 23 | 2023 – 24 |  |  |
|  | (kg ha-1) | kg ha-1 of N-NH3 (% of N-NH3) | | | | (%) |
| NA | 150 | 3.77 (2.51) | 1.47 (0.98) | 1.92 (1.28) | 7.16 | 91.93 |
| 400 | 5.30 (1.32) | 1.60 (0.40) | 1.48 (0.37) | 8.38 | 96.10 |
|  |  |  |  |  |  |  |
| UC | 150 | 32.01 (21.34) | 30.08 (20.05) | 26.73 (17.82) | 88.82 | - |
| 400 | 87.60 (22.0) | 69.87 (17.46) | 57.55 (14.38) | 215.02 | - |
|  |  |  |  |  |  |  |
| UNBPT | 150 | 28.92 (19.28) | 21.88 (14.58) | 21.93 (14.62) | 72.73 | 18 |
| 400 | 85.14 (21.28) | 58.30 (15.57) | 48.26 (12.06) | 191.70 | 11 |
|  |  |  |  |  |  |  |

**Table S5.** Cumulative N-NH₃ losses (kg ha⁻¹) and percentages relative to the applied N dose (in parentheses) during the 2021–22, 2022–23, and 2023–24 crop seasons. The table includes parameter *a* (modeled loss estimate) and the percentage reduction in losses compared to conventional urea.

| Agronomic variables | Crop season | Fertilizers | Equation | R² | Dose  (kg de N ha-1) | Result |
| --- | --- | --- | --- | --- | --- | --- |
|  |  |  |  |  |  |  |
| Leaf N content  (g kg-1) | 2021 – 22 | * | * | * | * | 33.45 |
| 2022 – 23 | NA | y = 0.005x + 27.974 | 0.57 | 525 | 30.59 |
| UNBPT | y = 0.0071x + 27.9394 | 0.62 | 525 | 31.66 |
| UC | y = x | * | * | 28.26 |
| 2023 – 24 |  | y = 0.01x + 26.69 | - | 525 | 28.54 |
| Grain yield  (kg ha-1) | 2021 – 22 |  | y = 345.37 + 8.92x | 0.95 | 168.4 | 1.847 |
| 2022 – 23 | NA | y = -0.0110x² + 9.845x + 644.833 | 0.95 | 447 | 2.847 |
| UNBPT | y = 4.2312x + 663.530 | 0.83 | 525 | 2.884 |
| UC | y = 4.382x + 689.090 | 0.89 | 525 | 2.989 |
| 2023 – 24 | UNBPT | y = 5.759x + 1.636,73 | 0.85 | 525 | 4.660 |
| NA | y = -0.019x² + 13.877x + 1.307,28 | 0.96 | 365 | 3.841 |
| UC | y = -0.027x² + 16.128x + 1.242,05 | 0.99 | 298 | 3650 |
| Coffee bean N accumulation  (kg ha-1) | 2021 – 22 | - | y = 7.55 + 0.21x | 0.95 | 171.66 | 43.60 |
| 2022 – 23 | UNBPT | y = 0.107x + 16.161 | 0.87 | 525 | 72.33 |
| NA | y = -0.0003x² + 0.253x + 16.312 | 0.99 | 421 | 69.65 |
| UC | y = 0.134x 12.714 | 0.85 | 525 | 83.06 |
| 2023 – 24 | UNBPT | y = 0.10x + 16.16 | 0.86 | 525 | 68.66 |
| NA | y = -0.0004x² + 0.300x + 36.004 | 0.71 | 375 | 92.25 |
| UC | y = -0.0004x² + 0.283x + 35.309 | 0.95 | 353 | 85.36 |
| Nitrogen content in the husk  (g kg-1) | 2021 – 22 | - | y = -0.0002x² + 0.117x + 5.628 | 0.94 | 292 | 83.83 |
| 2022 – 23 | UNBPT | y = 0.058x + 9.183 | 0.84 | 525 | 39.63 |
| NA | y = 0.051x + 13.381 | 0.78 | 525 | 40.15 |
| UC | y = 0.062x + 9.251 | 0.86 | 525 | 41.80 |
| 2023 – 24 | UNBPT | y = 0.076x + 26.303 | 0.80 | 525 | 66.20 |
| NA | y = -0.0002x² + 0.194x + 19.849 | 0.99 | 485 | 66.88 |
| UC | y = -0.0004x² + 0.236x + 19.621 | 0.99 | 295 | 54.43 |

**Table S6.** Adjusted equations, coefficients of determination (R²), estimated optimal N doses, and corresponding response values for agronomic variables of Arabica coffee under different nitrogen fertilizers (conventional urea – UC, urea with urease inhibitor NBPT – UNBPT, and ammonium nitrate – NA) for the 2021–2022, 2022–2023, and 2023–2024 crop seasons. When applicable, mathematical models relating N dose to the analyzed variable are presented. In cases without model fit, data represent the observed mean (*).
